# Supplementary material
Source: MDPI journal article supplement (https://www.mdpi.com/2225-1154/10/2/28)
Supplement: s1 [file s1]

# Sub-hourly precipitation extremes in mainland Portugal and their driving mechanisms

J. A. Santos<sup>1</sup>, M. Belo-Pereira<sup>2,\*</sup>

<sup>1</sup>*Centre for the Research of Agroenvironmental and Biological Sciences, CITAB, Universidade de Trás-os-Montes e Alto Douro, UTAD, 5000-801 Vila Real, Portugal*

<sup>2</sup>*Instituto Português do Mar e da Atmosfera, Divisão de Meteorologia Aeronáutica, Rua C do Aeroporto, 1749-077 Lisboa, Portugal*

\*Correspondence: [jsantos@utad.pt](mailto:jsantos@utad.pt)

## Supplemental Material

**Table S1.** List of the selected 71 weather stations (WS) in mainland Portugal. Their codes, name, latitude, longitude, and elevation (meters above mean sea level) are shown. The start and end years of the available data by weather station are also listed (end years for currently operational stations are indicated by -). The corresponding percentages of missing data in the 10-minute precipitation over the recording period are also provided. Stations with surface pressure records are highlighted in their codes with \*. Data source: IPMA.

| Code | Weather station name | Latitude<br>(°N) | Longitude<br>(°W) | Elevation<br>(m AMSL) | Start<br>year | End<br>year | Missing data<br>(%) |
|------|----------------------|------------------|-------------------|-----------------------|---------------|-------------|---------------------|
| 531* | Cabo Carvoeiro       | 39.361           | 9.406             | 32                    | 2000          | -           | 81                  |
| 533* | Sagres               | 37.012           | 8.949             | 25                    | 2000          | -           | 73                  |
| 535* | Lisboa Geofísico     | 38.719           | 9.149             | 77                    | 2009          | 2014        | 5                   |
| 541* | Sines Monte          | 37.954           | 8.838             | 103                   | 2000          | 2006        | 1                   |
| 542* | Sines Cabo           | 37.957           | 8.887             | 19                    | 2000          | -           | 85                  |
| 543* | Viana do Castelo     | 41.706           | 8.802             | 16                    | 2009          | -           | 71                  |
| 545* | Porto Pedras Rubras  | 41.233           | 8.681             | 63                    | 2000          | -           | 5                   |
| 546* | Porto Serra Pilar    | 41.138           | 8.602             | 93                    | 2006          | -           | 72                  |
| 548* | Coimbra Aeródromo    | 40.156           | 8.467             | 170                   | 2000          | -           | 2                   |
| 551* | Viana do Castelo     | 41.648           | 8.804             | 48                    | 2002          | 2010        | 31                  |
| 554* | Faro Aeroporto       | 37.016           | 7.971             | 8                     | 2002          | 2014        | 11                  |
| 555* | Faro                 | 37.018           | 7.921             | 32                    | 2000          | -           | 68                  |
| 557* | Évora                | 38.572           | 7.906             | 309                   | 2000          | -           | 56                  |
| 558* | Évora CC             | 38.536           | 7.887             | 246                   | 2000          | -           | 4                   |
| 560* | Viseu CC             | 40.714           | 7.895             | 636                   | 2010          | -           | 1                   |
| 562* | Beja                 | 38.024           | 7.867             | 246                   | 2000          | -           | 5                   |
| 566* | Vila Real            | 41.308           | 7.74              | 481                   | 2000          | -           | 54                  |
| 567* | Vila Real CC         | 41.274           | 7.717             | 561                   | 2000          | -           | 0                   |
| 568* | Penhas Douradas      | 40.411           | 7.558             | 1380                  | 2000          | -           | 8                   |
| 570* | Castelo Branco       | 39.839           | 7.478             | 449                   | 2000          | -           | 3                   |
| 571* | Portalegre           | 39.294           | 7.421             | 597                   | 2000          | -           | 2                   |
| 575* | Bragança             | 41.803           | 6.742             | 690                   | 2000          | -           | 5                   |
| 577* | Odemira S. Teotónio  | 37.525           | 8.754             | 76                    | 2000          | -           | 10                  |
| 579* | Lisboa Gago Coutinho | 38.766           | 9.128             | 104                   | 2000          | -           | 1                   |
| 604  | Geres Carris         | 41.750           | 8.033             | 1480                  | 2000          | -           | 22                  |
| 605  | Geres                | 41.733           | 8.150             | 370                   | 2000          | -           | 20                  |
| 606  | Lamas de Mouro       | 42.033           | 8.183             | 880                   | 2000          | -           | 24                  |
| 611  | Montalegre           | 41.822           | 7.787             | 1005                  | 2000          | -           | 12                  |
| 615  | Ponte de Lima        | 41.763           | 8.571             | 40                    | 2000          | -           | 15                  |
| 616  | Chaves Aeródromo     | 41.725           | 7.465             | 360                   | 2000          | -           | 2                   |
| 619  | Cabril               | 41.716           | 8.016             | 585                   | 2000          | -           | 11                  |
| 622  | Braga Merelim        | 41.575           | 8.451             | 65                    | 2000          | -           | 10                  |
| 630  | Cabeceiras de Basto  | 41.533           | 7.966             | 350                   | 2001          | -           | 18                  |
| 632  | Mirandela            | 41.514           | 7.190             | 250                   | 2000          | -           | 10                  |
| 633  | Macedo de Cavaleiros | 41.567           | 6.787             | 702                   | 2000          | -           | 22                  |
| 635  | Miranda do Douro     | 41.498           | 6.271             | 693                   | 2002          | -           | 6                   |

Table S1. (Continuation)

|      |                       |        |       |      |      |      |    |
|------|-----------------------|--------|-------|------|------|------|----|
| 637  | Mogadouro             | 41.333 | 6.724 | 644  | 2002 | -    | 10 |
| 644  | Carrazeda de Ansiães  | 41.233 | 7.283 | 715  | 2000 | -    | 22 |
| 654  | Moncorvo              | 41.189 | 7.018 | 600  | 2000 | -    | 17 |
| 666  | Trancoso Bandarra     | 40.780 | 7.351 | 850  | 2000 | -    | 22 |
| 671  | Figueira Cast Rodrigo | 40.830 | 6.940 | 635  | 2000 | -    | 13 |
| 683  | Guarda                | 40.528 | 7.278 | 1020 | 2000 | -    | 11 |
| 685  | Nelas                 | 40.523 | 7.855 | 425  | 2000 | -    | 10 |
| 687* | Covilhã Aeródromo     | 40.264 | 7.482 | 482  | 2019 | -    | 22 |
| 697  | Lousa Aeródromo       | 40.143 | 8.244 | 195  | 2000 | -    | 11 |
| 704  | Dunas de Mira         | 40.446 | 8.761 | 14   | 2019 | -    | 91 |
| 705  | Anadia                | 40.439 | 8.440 | 45   | 2019 | -    | 9  |
| 707  | Coimbra               | 40.213 | 8.455 | 35   | 2019 | -    | 95 |
| 713  | Figueira da Foz       | 40.140 | 8.806 | 4    | 2019 | -    | 91 |
| 716  | Ansião                | 39.898 | 8.410 | 396  | 2019 | -    | 91 |
| 718  | Leiria                | 39.781 | 8.821 | 45   | 2019 | -    | 91 |
| 721  | São Pedro de Moel     | 39.764 | 9.031 | 40   | 2019 | -    | 92 |
| 746  | Santa Cruz            | 39.126 | 9.379 | 40   | 2019 | -    | 95 |
| 750  | Cabo da Roca          | 38.782 | 9.498 | 141  | 2019 | -    | 91 |
| 762  | Lisboa Ajuda          | 38.710 | 9.183 | 69   | 2019 | -    | 91 |
| 767  | Pegões                | 38.651 | 8.635 | 64   | 2019 | -    | 91 |
| 773  | Almada                | 38.617 | 9.213 | 5    | 2019 | -    | 91 |
| 788  | Zambujeira            | 37.582 | 8.743 | 67   | 2000 | -    | 91 |
| 790  | Fóia                  | 37.314 | 8.596 | 895  | 2000 | -    | 93 |
| 800  | Sabugal               | 40.339 | 7.036 | 858  | 2000 | -    | 14 |
| 803  | Zebreira              | 39.866 | 7.016 | 375  | 2000 | -    | 13 |
| 806  | Proença-a-Nova        | 39.728 | 7.870 | 379  | 2000 | -    | 13 |
| 812  | Alvega                | 39.461 | 8.026 | 51   | 2000 | -    | 9  |
| 824  | Avis Benavila         | 39.106 | 7.877 | 150  | 2000 | -    | 11 |
| 835  | Elvas                 | 38.889 | 7.140 | 208  | 2000 | -    | 5  |
| 837  | Estremoz              | 38.862 | 7.512 | 366  | 2000 | -    | 13 |
| 863  | Mértola Vale Formoso  | 37.757 | 7.551 | 190  | 2000 | -    | 7  |
| 865  | Alcoutim Martim       | 37.437 | 7.768 | 290  | 2000 | 2016 | 17 |
| 867  | Castro Marim          | 37.229 | 7.425 | 5    | 2000 | -    | 5  |
| 868  | Almodôvar             | 37.400 | 8.083 | 400  | 2000 | -    | 48 |
| 878* | Portimão Aeródromo    | 37.147 | 8.583 | 14   | 2000 | -    | 6  |

**Table S2.** List of mesohigh episodes related to SHHP events for synoptic-type RegL, with the year, month, day, and 10-minute occurrence (chronological order). The weather station (WS) code is also indicated.

| Year | Month | Day | Hour | Minutes | WS code |
|------|-------|-----|------|---------|---------|
| 2000 | 5     | 1   | 13   | 30      | 562     |
| 2000 | 5     | 10  | 13   | 50      | 575     |
| 2000 | 5     | 20  | 22   | 0       | 575     |
| 2001 | 5     | 9   | 13   | 30      | 543     |
| 2001 | 7     | 30  | 17   | 0       | 570     |
| 2002 | 6     | 19  | 2    | 30      | 575     |
| 2003 | 8     | 10  | 15   | 50      | 570     |
| 2003 | 11    | 15  | 10   | 20      | 554     |
| 2006 | 6     | 14  | 0    | 30      | 562     |
| 2006 | 7     | 14  | 19   | 0       | 571     |
| 2007 | 9     | 14  | 18   | 30      | 571     |
| 2008 | 6     | 16  | 15   | 20      | 560     |
| 2010 | 4     | 16  | 10   | 10      | 554     |
| 2010 | 4     | 21  | 21   | 30      | 560     |
| 2011 | 4     | 21  | 17   | 40      | 558     |
| 2011 | 5     | 20  | 14   | 40      | 560     |
| 2014 | 7     | 2   | 15   | 20      | 570     |
| 2014 | 9     | 27  | 14   | 40      | 548     |
| 2014 | 10    | 13  | 17   | 10      | 558     |
| 2014 | 11    | 27  | 21   | 40      | 535     |
| 2015 | 6     | 14  | 14   | 0       | 570     |
| 2017 | 6     | 17  | 17   | 20      | 570     |
| 2017 | 8     | 29  | 16   | 10      | 558     |
| 2018 | 4     | 21  | 6    | 10      | 878     |
| 2018 | 5     | 20  | 17   | 0       | 687     |
| 2018 | 6     | 21  | 17   | 30      | 541     |
| 2020 | 7     | 21  | 18   | 40      | 558     |

**Table S3.** List of mesohigh episodes related to SHHP events for synoptic-type RemL, with the year, month, day, and 10-minute occurrence (chronological order). The weather station (WS) code is also indicated.

| Year | Month | Day | Hour | Minutes | WS code |
|------|-------|-----|------|---------|---------|
| 2000 | 5     | 11  | 16   | 30      | 571     |
| 2000 | 5     | 22  | 15   | 20      | 560     |
| 2001 | 2     | 6   | 12   | 10      | 535     |
| 2001 | 2     | 6   | 12   | 10      | 579     |
| 2001 | 10    | 20  | 11   | 40      | 570     |
| 2002 | 1     | 21  | 12   | 40      | 543     |
| 2002 | 10    | 29  | 20   | 0       | 535     |
| 2002 | 10    | 29  | 20   | 30      | 560     |
| 2002 | 11    | 13  | 11   | 20      | 545     |
| 2002 | 11    | 13  | 12   | 20      | 560     |
| 2002 | 11    | 13  | 14   | 20      | 571     |
| 2002 | 11    | 20  | 20   | 0       | 543     |
| 2003 | 10    | 30  | 23   | 10      | 560     |
| 2003 | 10    | 31  | 2    | 40      | 579     |
| 2003 | 10    | 31  | 2    | 50      | 535     |
| 2003 | 10    | 31  | 2    | 50      | 571     |
| 2004 | 8     | 16  | 14   | 30      | 571     |
| 2004 | 10    | 20  | 9    | 50      | 575     |
| 2006 | 10    | 22  | 22   | 10      | 562     |
| 2006 | 10    | 23  | 3    | 40      | 562     |
| 2006 | 10    | 25  | 2    | 40      | 562     |
| 2006 | 10    | 25  | 3    | 10      | 558     |
| 2006 | 11    | 24  | 17   | 0       | 535     |
| 2007 | 11    | 19  | 22   | 10      | 554     |
| 2008 | 1     | 3   | 1    | 20      | 579     |
| 2008 | 1     | 3   | 1    | 30      | 535     |
| 2008 | 1     | 3   | 3    | 20      | 562     |
| 2008 | 4     | 18  | 1    | 20      | 554     |
| 2009 | 6     | 15  | 15   | 30      | 579     |
| 2009 | 10    | 20  | 9    | 0       | 535     |
| 2009 | 11    | 13  | 22   | 20      | 545     |
| 2009 | 12    | 23  | 2    | 40      | 878     |
| 2010 | 1     | 12  | 11   | 30      | 541     |
| 2010 | 9     | 20  | 14   | 0       | 571     |
| 2010 | 10    | 8   | 15   | 0       | 579     |
| 2011 | 2     | 13  | 9    | 10      | 551     |
| 2011 | 2     | 13  | 9    | 40      | 545     |
| 2011 | 2     | 16  | 3    | 10      | 545     |
| 2011 | 2     | 16  | 3    | 20      | 546     |
| 2011 | 9     | 1   | 13   | 0       | 562     |
| 2011 | 10    | 24  | 0    | 10      | 551     |

**Table S3.** (*Continuation*)

|      |    |    |    |    |     |
|------|----|----|----|----|-----|
| 2011 | 11 | 2  | 11 | 40 | 570 |
| 2011 | 12 | 1  | 21 | 30 | 545 |
| 2013 | 10 | 22 | 3  | 0  | 541 |
| 2013 | 12 | 24 | 17 | 0  | 570 |
| 2016 | 1  | 10 | 5  | 10 | 545 |
| 2017 | 12 | 11 | 1  | 30 | 541 |
| 2018 | 1  | 13 | 12 | 0  | 548 |
| 2018 | 12 | 18 | 11 | 20 | 545 |
| 2019 | 12 | 19 | 21 | 40 | 535 |
| 2020 | 11 | 24 | 22 | 10 | 551 |



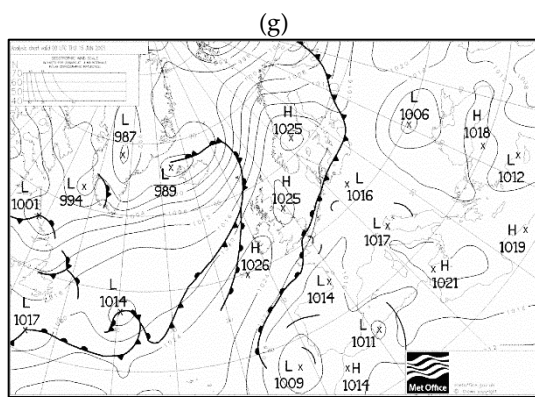

15 June 2006, 00:20 UTC, **25.1 mm**  
605: Gerês (+4 WS)

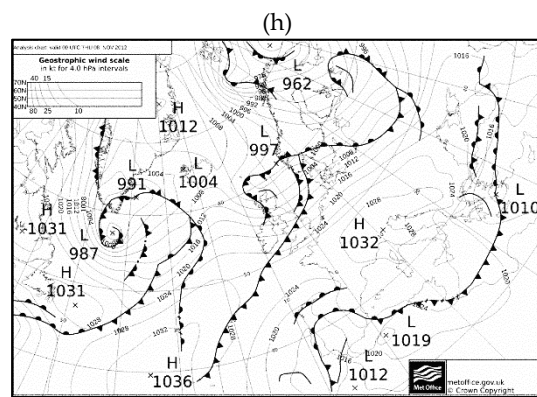

7 November 2012, 22:10 UTC, **25.0 mm**  
566: Vila Real (+0 WS)

**Figure S1. (Continuation).**



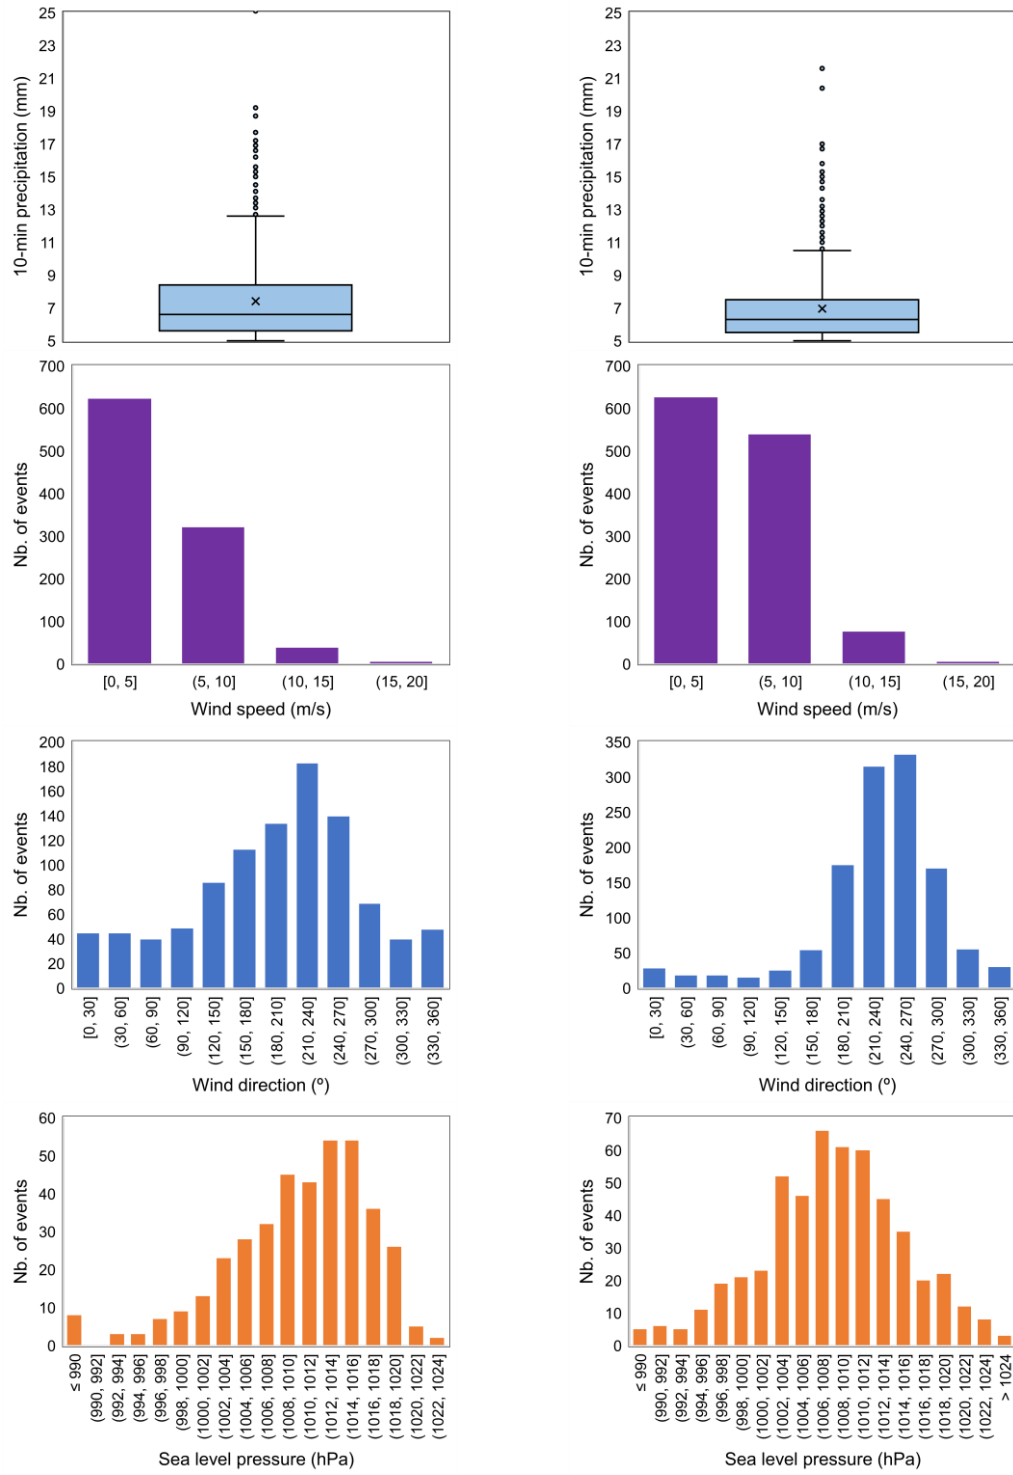

**Figure S2.** Distribution of the outlined atmospheric variables recorded at the weather stations at the occurrence of the sub-hourly extreme precipitation events and by class separately (*left panels: RegL, right panels: RemL*).

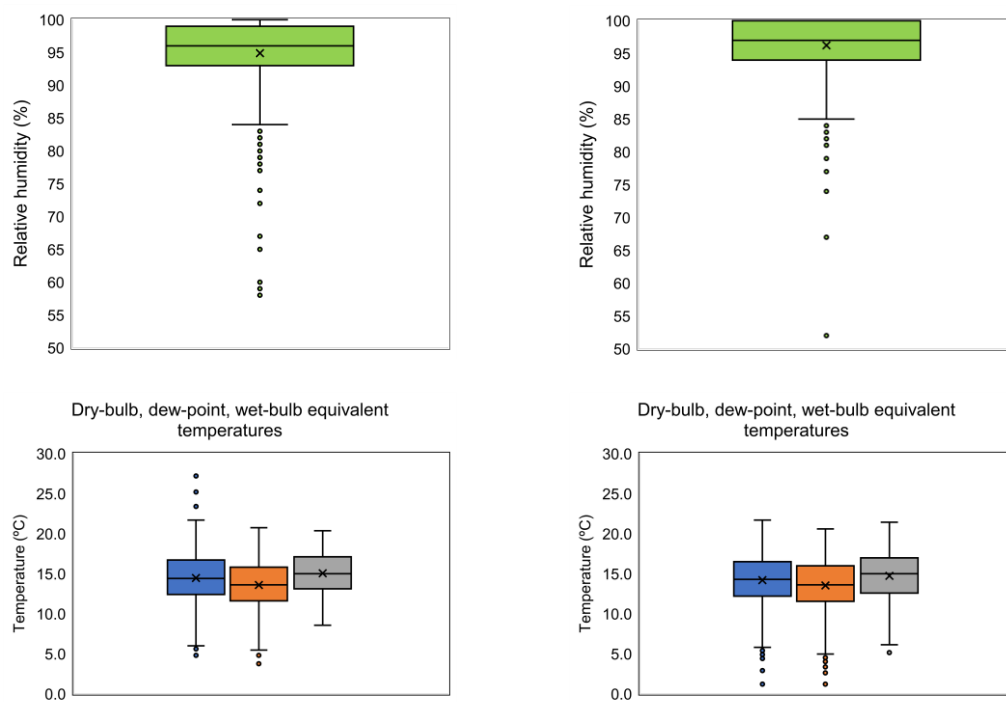

Figure S2. (Continuation).

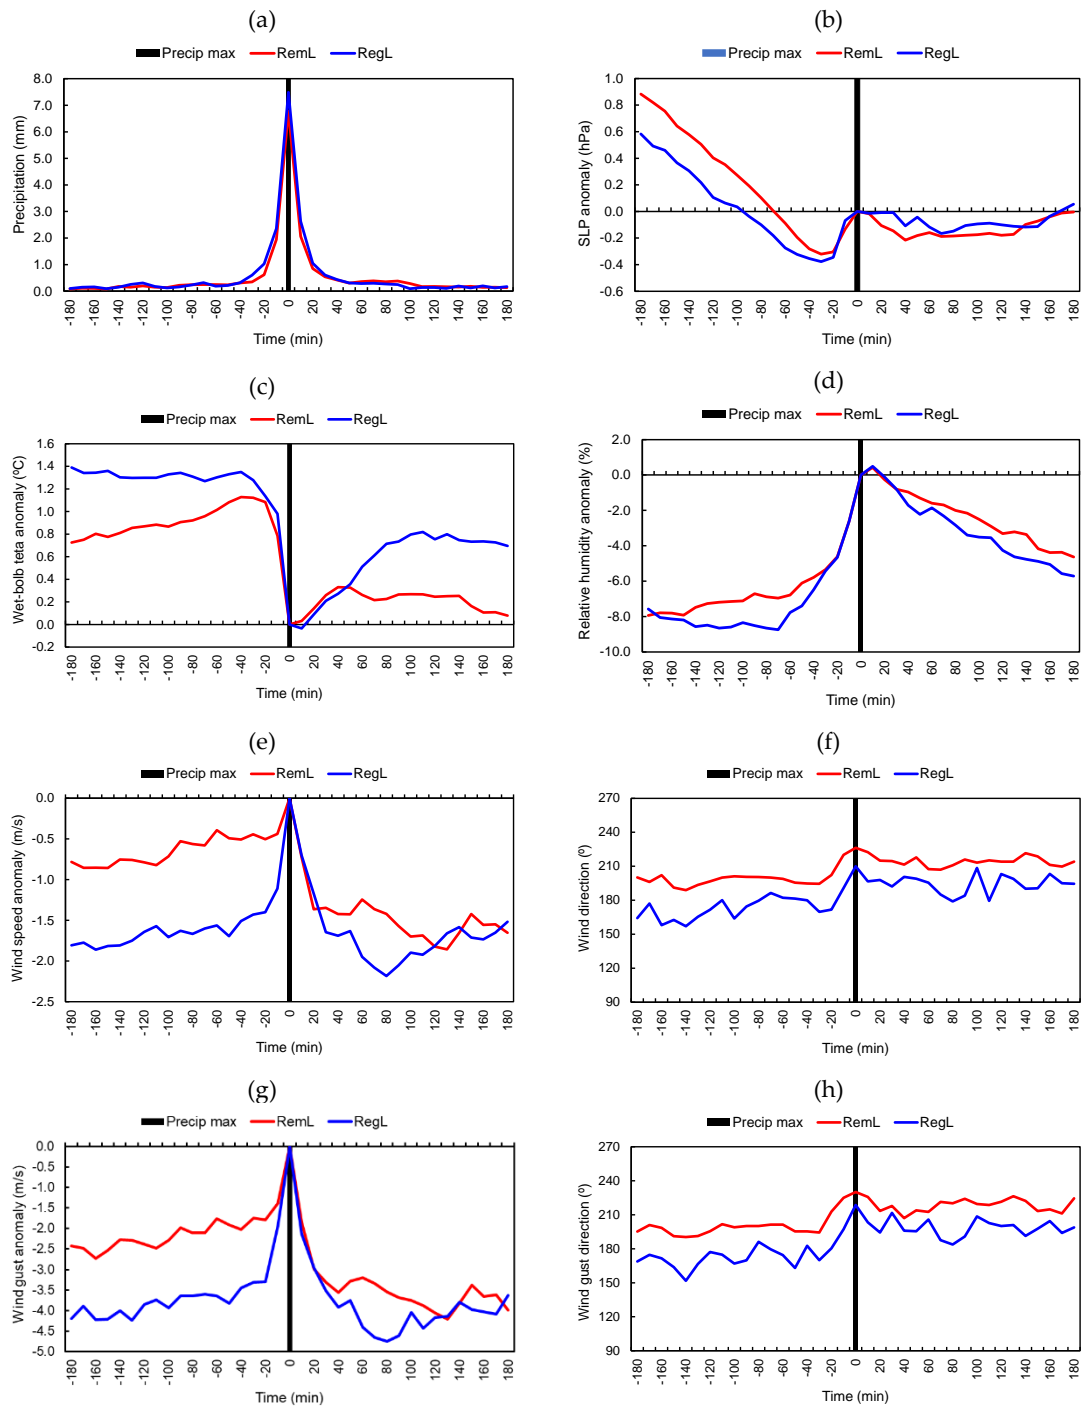

**Figure S3.** Mean chronological series over a 6-hour window centered at the instant of the event occurrences (87 events with 10-minute precipitation  $\geq 5.0$  mm, 35 RegL and 52 RemL), for the Lisbon weather station (579: *Lisboa Gago Coutinho*) and for: (a) precipitation, (b) sea level pressure anomaly (w. r. t. the event instant), (c) wet-bulb potential temperature anomaly, (d) relative humidity anomaly, (e) wind speed anomaly, (f) wind direction, (g) wind gust, (h) wind gust direction. The event occurrence is tracked with a vertical black line.

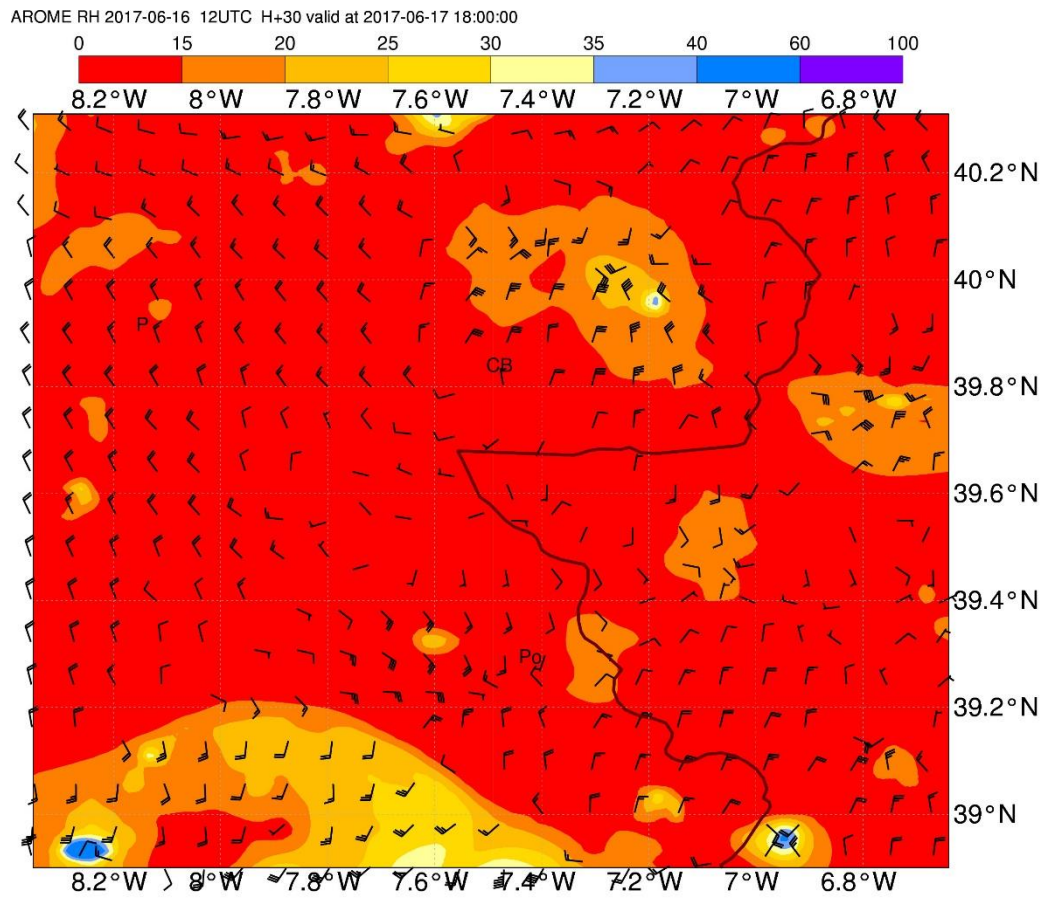

**Figure S4.** AROME forecast (H+30) of 2-m relative humidity (in %) on 17 June 2017, valid at 18:00 UTC.

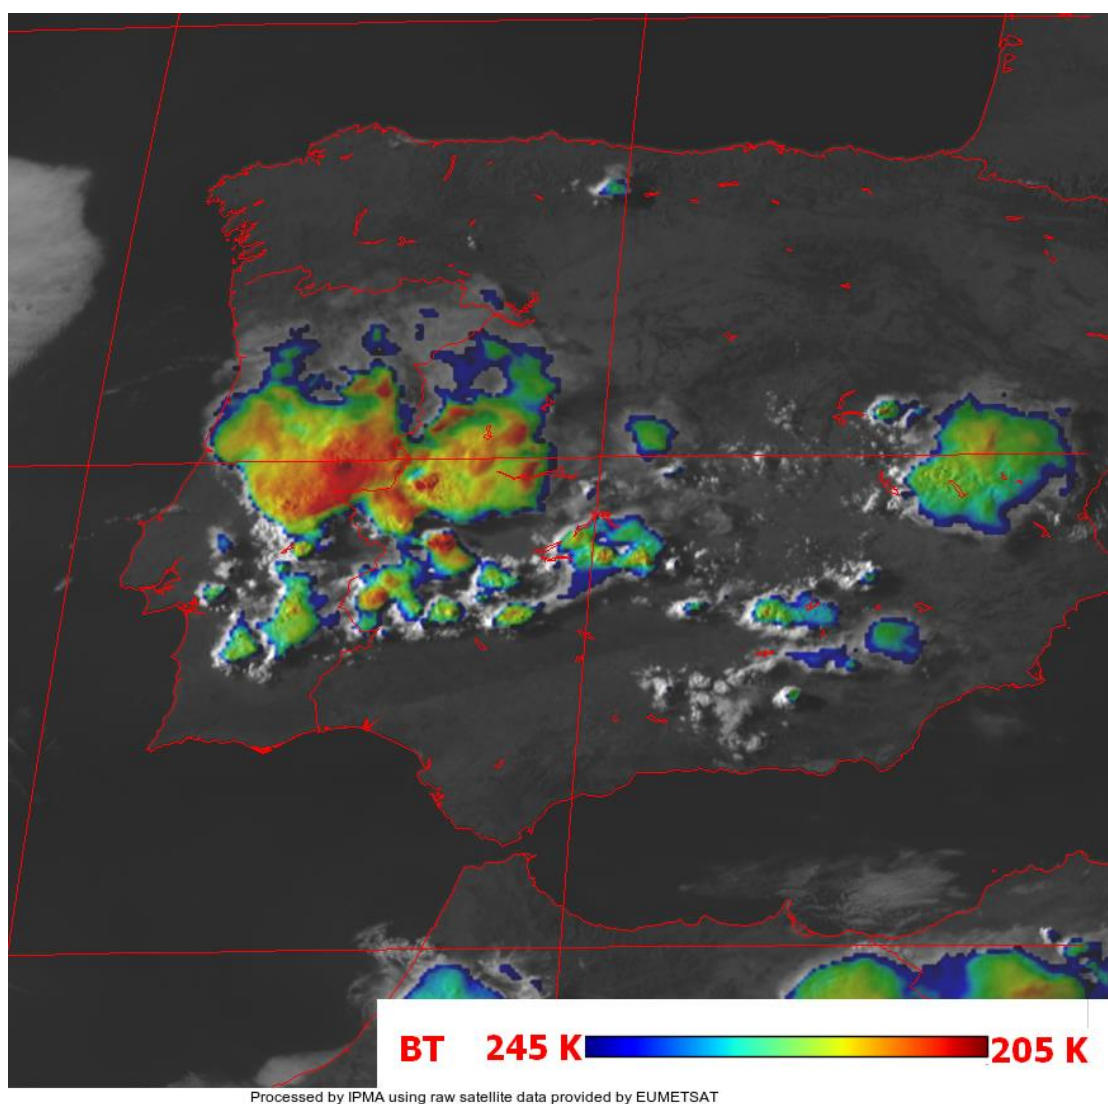

**Figure S5.** Satellite sandwich product on 17 June 2017, at 17:00 UTC. This product blends the High Resolution Visible (HRV) image (background) with color-enhanced IR10.8 image, showing the details of the cloud top temperature (in K).

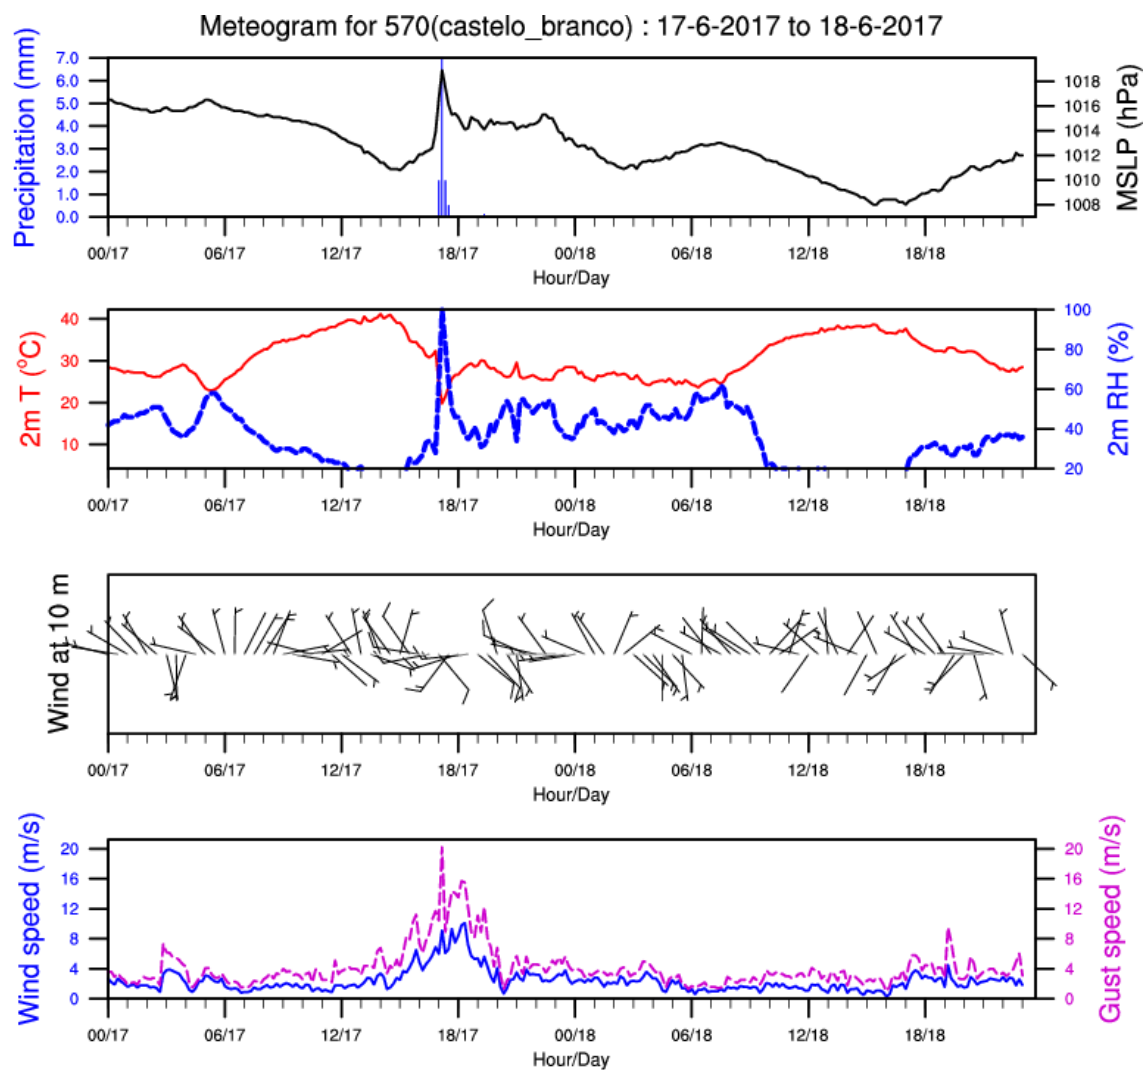

**Figure S6.** Meteogram based on the 10-minutes observations at the weather station 570 (*Castelo Branco*), on 17 and 18 June 2017.
